are negligible. Further analysis is necessary to introduce inertial effects in the model (Simon and Frêne, 1992) and to establish a relation between the equivalent sand roughness and the roughness normalized characteristic  $R_a$ . Finally, it is necessary to validate the rough turbulent model through an experimental study.

## References

- Childs, D. W., Chang-Ho Kim, 1985, "Analysis and Testing for Rotordynamic Coefficients of Turbulent Annular Seals With Different, Directionally-homogeneous Surface-Roughness Treatment for Rotor and Stator Elements," *ASME JOURNAL OF TRIBOLOGY*, Vol. 107, pp. 296-306.
- Childs, D., Elrod, D., and Hale, K., 1989, "Annular Honeycomb Seals: Test Results for Leakage and Rotordynamic Coefficients; Comparisons to Labyrinth and Smooth Configurations," *ASME JOURNAL OF TRIBOLOGY*, Vol. 111, pp. 293-301.
- Coosteix, J., 1989, *Turbulence et Couche Limite*, Cepadues Editions, Paris, Tome 2, Chapter 9-5-3, p. 402-409.

- Elrod, H. G., and Ng, C. W., 1967, "A Theory for Turbulent Fluid Films and its Application to Bearings," *ASME JOURNAL OF LUBRICATION TECHNOLOGY*, pp. 346-362.
- Hashimoto, H., and Wada, S., 1989, "Theoretical Approach to Turbulent Lubrication Problems Including Surface Roughness Effects," *ASME JOURNAL OF TRIBOLOGY*, Vol. 111, pp. 17-22.
- Keener, J. P., 1988, *Principles of Applied Mathematics, Transformation and Approximation*, Addison-Wesley, Redwood City, CA, pp. 38-45.
- San Andres, L., Yang, Z., and Childs, D. W., 1993a, "Thermal Effects in Cryogenic Liquid Annular Seals," *ASME JOURNAL OF TRIBOLOGY*, pp. 267-284.
- San Andres, L., 1991b, "Analysis of Variable Fluid Properties, Turbulent Annular Seals," *ASME JOURNAL OF TRIBOLOGY*, Vol. 113, pp. 694-702.
- Schlichting, H., translated by Kestin J., seventh edition 1987, *Boundary-Layer Theory*, McGraw-Hill, New York, pp. 578-583.
- Simon, F., and Frêne, J., 1992, "Analysis for Incompressible Flow in Annular Pressure Seals," *ASME JOURNAL OF TRIBOLOGY*, Vol. 114, pp. 431-438.
- Van Driest, E. R., 1956, "On Turbulent Flow Near a Wall," *J. Aeron. Sci.*, Vol. 23, p. 1007.
- Willcox, D. C., 1988, "Reassessment of the Scale-Determining Equation for Advanced Turbulence Models," *AIAA Journal*, Vol. 26, No. 11, pp. 1299-1310.

## DISCUSSION

### W. F. Hughes<sup>1</sup>

The authors have presented an interesting and informative paper which helps in understanding the effect of roughness on annular seals. However, it is not clear that inertia effects may be entirely neglected. The "inlet losses" are due to inertia effects and if the back pressure is low enough there is the possibility of anomolous liquid choking as the liquid flashes at the exit, again an inertial effect.

While it is true that the mean acceleration terms are identically zero in a uniform channel of fully developed flow in steady state, the inertia (i.e., kinetic energy) effects can be vitally important if the flow channel is not uniform as is the case if the shaft is misaligned or eccentric. These effects might indeed be small for low leakage seals, but they are generally important in high leakage turbulent seals such as those analyzed by P. A. Beatty and myself (1987, 1990).

Perhaps the authors could comment on any restrictions on leakage rate or the general validity of their model.

### Additional References

- Beatty, P. A., and Hughes, W. F., 1987, "Turbulent Two-Phase Flow in Annular Seals," *Trans. ASLE*, Vol. 30, No. 1, Jan., p. 11.
- Beatty, P. A., and Hughes, W. F., 1990, "Statified Two-Phase Flow in Annular Seals," *ASME JOURNAL OF TRIBOLOGY*, Vol. 112, No. 2, Apr., p. 372.

### L. San Andres<sup>2</sup>

A model of turbulent flow in annular seals taking into account the surface roughness of the stator and rotor is a welcome addition to the literature. The authors are complimented by their comprehensive work on the mechanics of turbulent flows with rough surfaces. The analysis complements and extends the classical work of Elrod and Ng, and soon, it will have well-deserved recognition by the fluid film lubrication dynamicists. Although the omission of land fluid inertia effects in annular pressure seal analysis is a major drawback of the work, I do agree with the authors' treatment that reduced the complexity of the problem, in order to give close attention to the mechanics of turbulent flow with rough surfaces.

Relevant questions which may improve the quality of this paper are:

(a) How are damping coefficients extracted from Eq. (3) since this does not have any squeeze film term, i.e.,  $d(\rho h)/dt$ ?

(b) As derived in the analysis, the turbulent coefficients  $G_x$  and  $G_z$  are strictly valid for planar flows ( $dh/dx=0$ ). How do the authors consider applying these results to seal geometries which as soon as rotor eccentricity varies, then  $dh/dx$  is non-zero.

(c) Could the authors provide a clear discussion as to the Reynolds number ranges (pressure and shear flow) defining the transition zone from laminar flow to fully developed turbulent flow? How is this accounted for in their analysis? Many annular seals handling light hydrocarbons appear to operate with shear Reynolds numbers between 800 to 2,000 and pressure flow Reynolds numbers on the same magnitude. The authors input on this issue would be most welcome.

(d) Is it possible for the authors to publish the polynomial expressions for  $k_x$  and  $k_z$  as outlined in Eq. (32)?

(e) Are Eqs. (40) for the force coefficients correct? Why is the total load  $WTo$  used on the calculation of the stiffness and damping coefficients and not its component on the  $X$  and  $Y$  direction? For example, the direct stiffness coefficient  $k_{xx}$  should be equal to  $k_{xx} = (WTo \cos \phi - W_{xx})/\Delta X$ , where  $\phi$  is the attitude angle between the load vector and the  $X$  axis.

(f) The results from the analysis are to be used for annular pressure seals where the axial pressure gradient is typically very large, i.e., axial pressure flow Reynolds no. of same magnitude or larger than circumferential flow shear Reynolds no. However, the results presented in Fig. 4 for the shear coefficients  $G_x$  and  $G_z$  are more applicable to plain journal bearings rather than pressure seals. Could the authors provide a similar figure but for  $dP/dz \gg dP/dx$ ? Also, some results for  $dP/dx > 0$  (backflow) will be of extreme interest.

(g) I would very much appreciate the authors comments on their planned work to analyze seals with macroscopic rough surfaces such as honeycomb or knurled patterns. Is the present work applicable to such situations?

### Authors' Closure

First, we want to acknowledge Electricity of France for its financial and technical support. The authors would like to express their appreciation of discussions written by W. F. Hughes and by Luis San Andres.

### W. F. Hughes discussion:

Inertial effect may be very important; we have chosen, as

<sup>1</sup> Professor of Mechanical Engineering, Emeritus, Carnegie Mellon University, Pittsburgh, PA 15213.

<sup>2</sup> Associate Professor, Mechanical Engineering Department, Texas A&M University, College Station, TX 77843.
